# Supplementary material for: The effects of repetitive transcranial magnetic stimulation in obese females with binge eating disorder: a protocol for a double-blinded, randomized, sham-controlled trial
Source: PubMed Central journal article supplement (PMC4533762; doi:10.1186/s12888-015-0569-8), 2015-08-12
Supplement: 12888_2015_569_MOESM1_ESM.pdf [file 12888_2015_569_MOESM1_ESM.pdf]

Table 1: Study measures and time points

| Measure                                                                                            | Screen (T.0) | Pre Baseline 1 (T.1) | Pre Baseline 2 (T.2) | Baseline rTMS Session 1 (T.3) | rTMS Sessions 2 to 19 (T.4-T.21) | rTMS Last Session 20 (T.22) | End-of Treatment Evaluation (T.23) – within 1 week after the last rTMS session. | 8 week follow up (T.24) |
|----------------------------------------------------------------------------------------------------|--------------|----------------------|----------------------|-------------------------------|----------------------------------|-----------------------------|---------------------------------------------------------------------------------|-------------------------|
| Informed Consent                                                                                   | ✓            |                      |                      |                               |                                  |                             |                                                                                 |                         |
| Height & Weight<br>Hip-waist circumference                                                         | ✓            |                      |                      | ✓                             |                                  |                             | ✓                                                                               | ✓                       |
| Menstrual history                                                                                  | ✓            |                      |                      |                               |                                  |                             | ✓                                                                               |                         |
| Evaluation of the Presence of Binge Eating & MINI (diagnostic interview)                           | ✓            |                      |                      |                               |                                  |                             |                                                                                 |                         |
| Evaluation of Binge Episodes & Adverse Events ( <i>at each visit – occurrence between visits</i> ) |              |                      |                      | ✓                             | ✓                                | ✓                           |                                                                                 | ✓                       |
| EDE 17.OD                                                                                          |              | ✓                    |                      |                               |                                  |                             |                                                                                 |                         |
| Laboratory blood exams                                                                             |              | ✓                    |                      |                               |                                  |                             |                                                                                 |                         |
| Biomarkers & fMRI                                                                                  |              |                      | ✓                    |                               |                                  |                             | ✓                                                                               |                         |
| TMS safety questionnaire                                                                           | ✓            |                      |                      |                               |                                  |                             |                                                                                 |                         |
| 7-day food intake diary (Completed 1-week before T.3, T.23 and T.24 visits)                        |              |                      |                      | ✓                             |                                  |                             | ✓                                                                               | ✓                       |
| Binge eating recording (in diary, 15 days before T3, T23 and T24)                                  |              |                      |                      | ✓                             |                                  |                             | ✓                                                                               | ✓                       |
| Self-report Questionnaires* (completed 1 week before the visits T3, T23 and T24)                   |              |                      |                      | ✓                             |                                  |                             | ✓                                                                               | ✓                       |
| Cognitive evaluation                                                                               |              |                      | ✓                    |                               |                                  |                             | ✓                                                                               |                         |
| FCT + VAS + FCQ-S and salivary cortisol                                                            |              |                      |                      | ✓                             |                                  | ✓                           |                                                                                 |                         |

EDE = Eating Disorder Examination; FCT = Food Challenge Task; fMRI = Functional Magnetic Resonance Image; rTMS = Repetitive Transcranial Magnetic Stimulation; \*Self-report questionnaires: Binge Eating Scale (BES), Depression Anxiety Stress Scales (DASS-21), Food Craving Questionnaire-Trait (FCQ-T), The Loss of Control over Eating Scale (LOCES), Three Eating Factor Questionnaire (TEF-Q), UPPS Impulsive Behavior Scale; T. = Time; VAS = Visual Analogue Scale.
